# Supplementary material for: The controllable patterning of tannic acid on DNA origami
Source: Royal Society of Chemistry journal article supplement (doi:10.1039/d3nr04715f), 2023-01-01
Supplement: d3nr04715f1.pdf [file d3nr04715f1.pdf]

## Supporting Information

### Controllable patterning of tannic acid on DNA origami

Yuanyuan Lu<sup>a</sup>, Liqiong Niu<sup>a</sup>, Pengyan Hao<sup>a</sup>, Xiaoya Sun<sup>a</sup>, Yongxi Zhao<sup>a,b</sup> and Na Wu<sup>\*a</sup>

<sup>a</sup> Institute of Analytical Chemistry and Instrument for Life Science, The Key Laboratory of Biomedical Information Engineering of Ministry of Education, School of Life Science and Technology, Xi'an Jiaotong University, Xianning West Road, Xi'an, Shaanxi 710049, P.R. China.

<sup>b</sup> Frontier Institute of Science and Technology, Xi'an Jiaotong University, Xi'an, Shaanxi 710049, P.R. China.

\*Corresponding author: wuna2017@xjtu.edu.cn

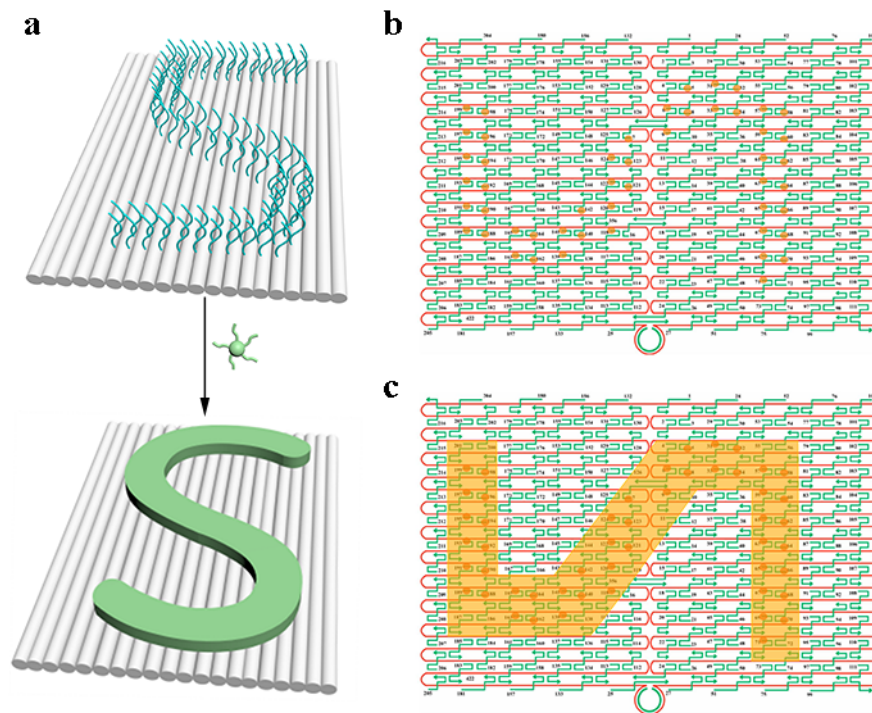

**Figure S1.** Calculation of theoretical deposition area ratio of TA on DNA origami.<sup>1</sup> (a) Schematic illustration of site-specific controllable patterning of tannic acid on a DNA origami template. (b) Description of calculation method 1: since there are 216 staples in rectangular origami, 50 of them are designed as pcDNA for TA adsorption, therefore, the TA deposition rate is  $50/216=23.1\%$ . (c) Description of calculation method 2: since the size of the rectangular origami tile is  $7000\text{ nm}^2$ , the TA deposition area is  $2065\text{ nm}^2$ , so the deposition ratio is  $2065/7000=29.5\%$ .

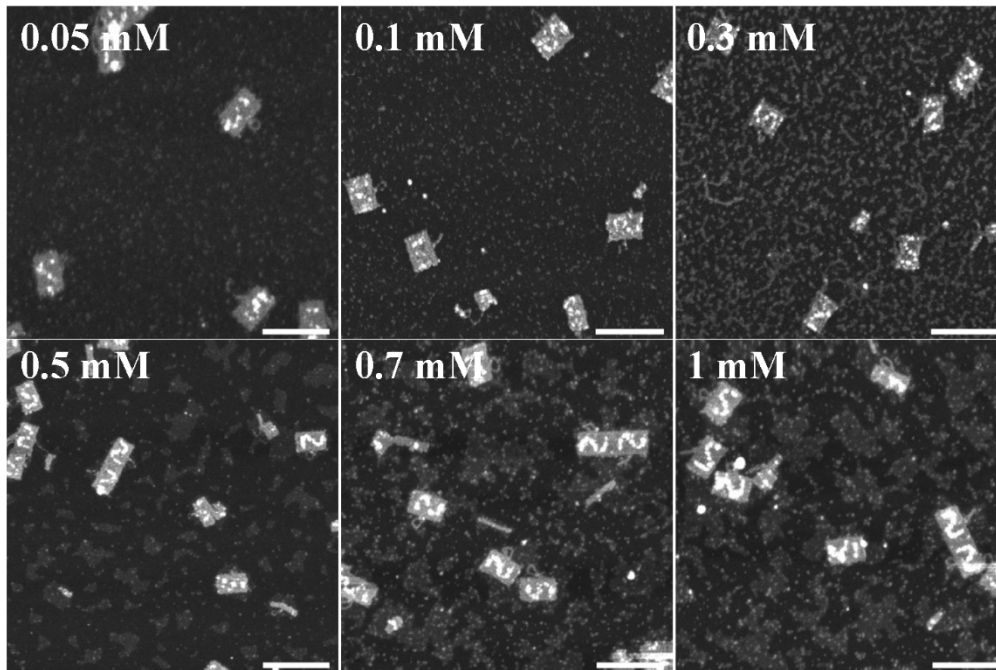

Fi

**Figure S2.** Effect of TA concentration on the course of patterning. AFM images of “S” patterns on DNA origami at different TA concentrations. Scale bars: 200 nm.

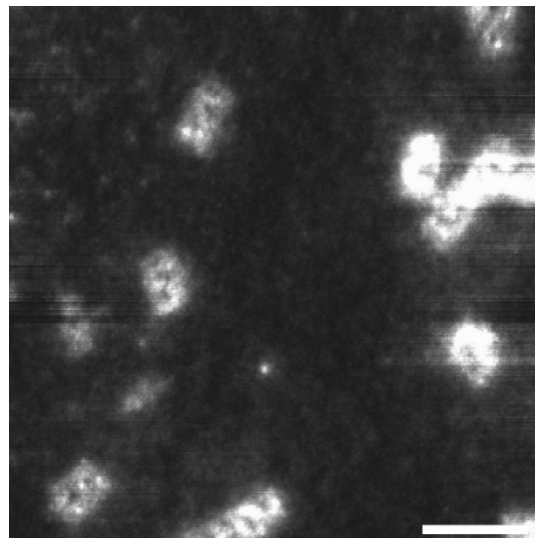

**Figure S3.** AFM image of “S” pattern on DNA origami at 2 mM TA. TA is adsorbed on the surface of mica to form a thin film, resulting in blurred nanopatterns. Scale bar: 200 nm.

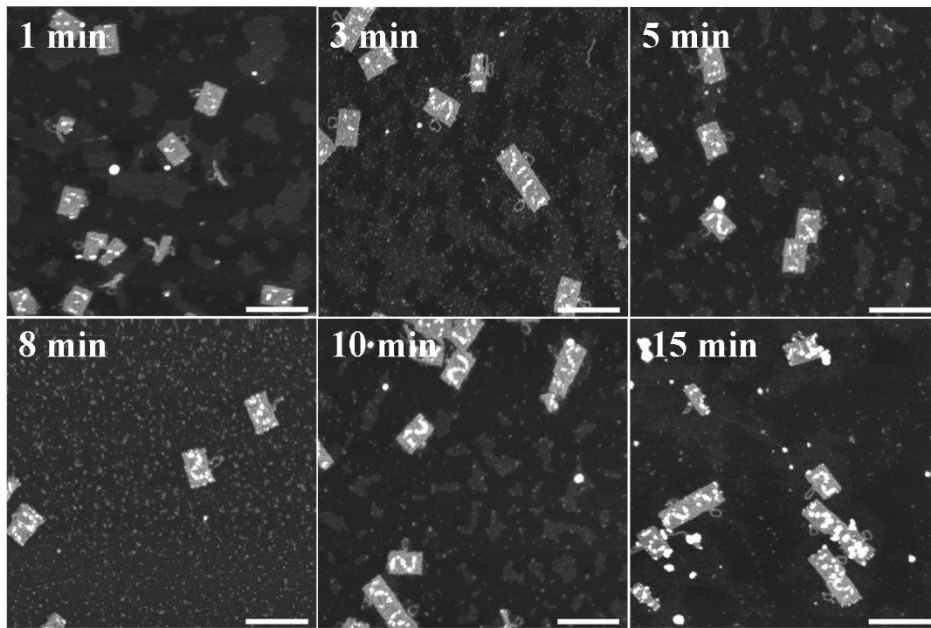

**Figure S4.** Effect of reaction time on the course of patterning. AFM images of “S” pattern on DNA origami at different reaction times. Scale bars: 200 nm.

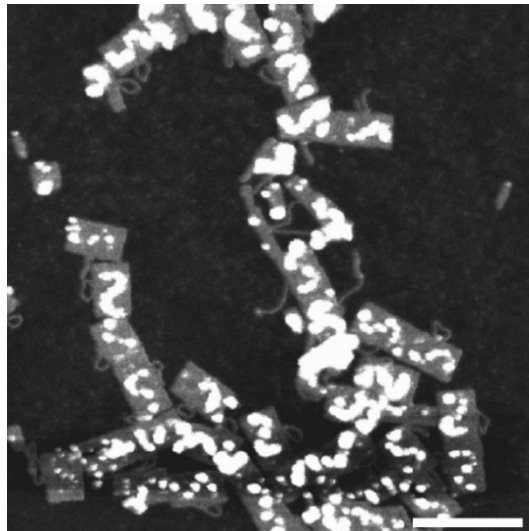

**Figure S5.** AFM image of the letter “S” on the DNA origami when the reaction time reaches 30 min. When the reaction time is too long, the origami will aggregate and the letter “S” overgrowth. Scale bar: 200 nm.

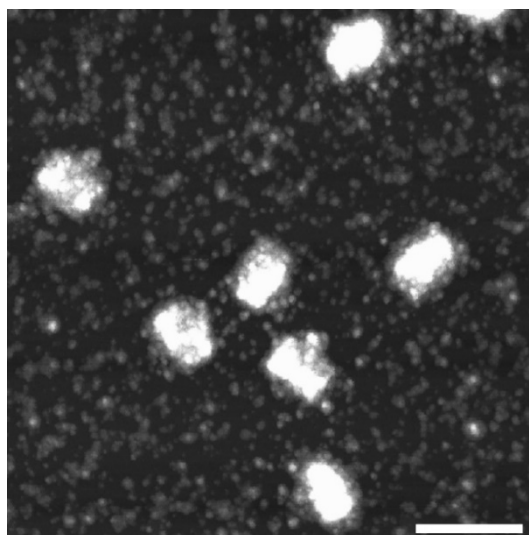

**Figure S6.** Representative AFM image of the TA pattern growing along the “S” shaped path on DNA origami assisted with  $Zn^{2+}$ . Scale bar: 200 nm.

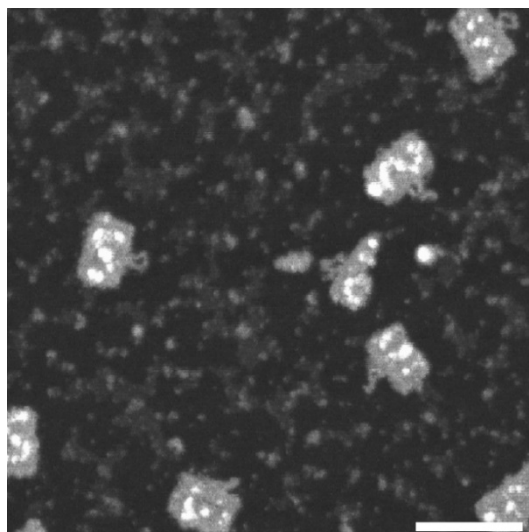

**Figure S7.** Representative AFM image of the TA pattern growing along the “S” shaped path on DNA origami assisted with  $Ca^{2+}$ . Scale bar: 200 nm.

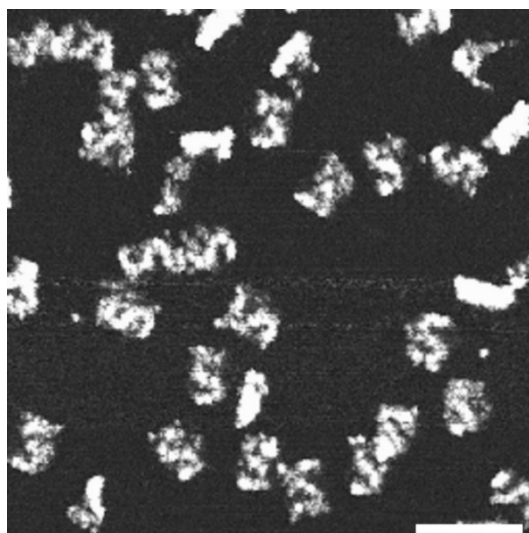

**Figure S8.** Representative AFM image of the “S” shaped pattern consisting of TA polymers on DNA origami after washing for three times with water. Scale bar: 200 nm.

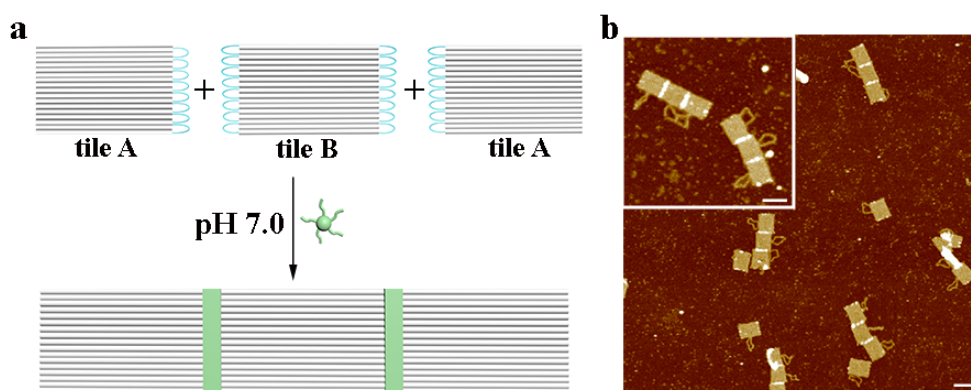

**Figure S9.** DNA origami trimers assembled by mixing origami tiles A and B at a ratio of 2:1 in the TA solution. (a) Assembly scheme for DNA origami trimers. (b) AFM image of DNA origami trimer. Scale bar: 100 nm.

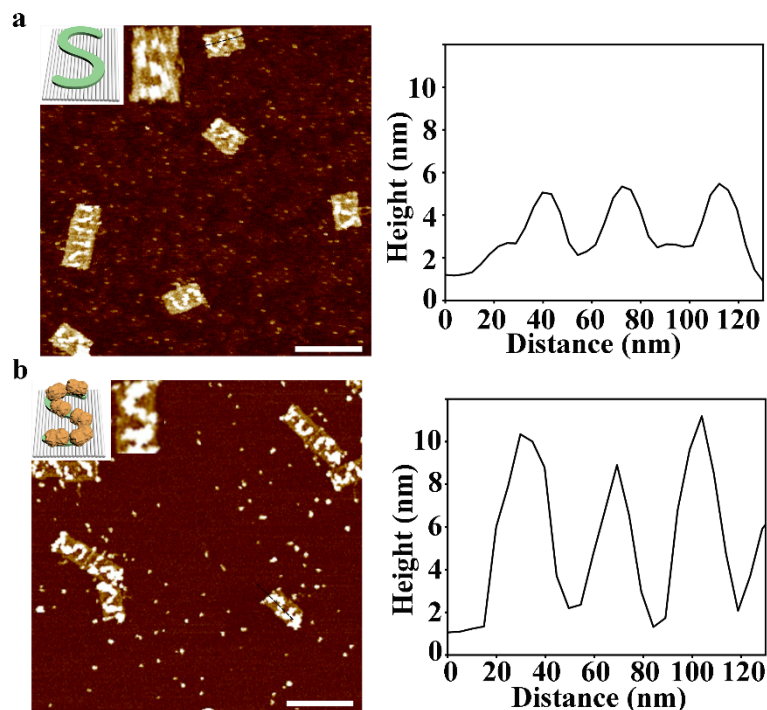

**Figure S10.** Glucose oxidase molecules adsorption on DNA origami along “S” shaped TA polymers. (a) “S” shaped pattern formed on DNA origami template after TA deposition and the cross-sectional analysis for TA nanopattern from AFM image. (b) The representative AFM image of glucose oxidase deposition on “S” shaped TA pattern and the corresponding cross-sectional analysis. Scale bars: 200 nm.

**Table S1.** Assembly yield of DNA origami dimers under pH adjustment.

| pH  | N (dimer) | Y (%)    |
|-----|-----------|----------|
| 7.0 | 0         | 0        |
| 7.0 | 103       | 66.4±3.1 |
| 5.5 | 20        | 17.2±4.5 |
| 7.0 | 97        | 65.1±4.2 |

**DNA sequences:**

**For the letter “S” pattern on DNA origami**

| DNA   | Sequences (5'-3')                                            |
|-------|--------------------------------------------------------------|
| S-005 | CTTGGGTCGTAGACATCGACGACTACTAACCAGAGACCCTCAGAACC GCCAGGGGTCAG |
| S-006 | CTTGGGTCGTAGACATCGACGACTACTTTATTCATAGGGAAGGTAATATTCATT CAGT  |
| S-007 | CTTGGGTCGTAGACATCGACGACTACTCATAACCCGAGGCATAGTAAGAGCTTTTAA G  |
| S-008 | CTTGGGTCGTAGACATCGACGACTACTATTGAGGGTAAAGGTGAATTATCAATCAC CGG |

|       |                                                              |
|-------|--------------------------------------------------------------|
| S-009 | CTTGGGTCGTAGACATCGACGACTACTAAAAGTAATATCTTACCGAAGCCCTCCAGAG   |
| S-031 | CTTGGGTCGTAGACATCGACGACTACTGCCACCACTCTTTTCATAATCAAACCGTCACC  |
| S-032 | CTTGGGTCGTAGACATCGACGACTACTGTTTGCCACCTCAGAGCCGCCACCGATACAGG  |
| S-033 | CTTGGGTCGTAGACATCGACGACTACTGACTTGAGAGACAAAAGGGCGACAAGTTACCA  |
| S-034 | CTTGGGTCGTAGACATCGACGACTACTAGCGCCAACCATTTGGGAATTAGATTATTAGC  |
| S-057 | CTTGGGTCGTAGACATCGACGACTACTAATCACAAATAGAAAATTCATATATAACGGA   |
| S-058 | CTTGGGTCGTAGACATCGACGACTACTTACAATCGTAGCACCATTACCATCGTTTTCA   |
| S-059 | CTTGGGTCGTAGACATCGACGACTACTATACCCAAGATAACCCACAAGAATAAACGATT  |
| S-060 | CTTGGGTCGTAGACATCGACGACTACTATCAGAGAAAGAACTGGCATGATTTTATTTTG  |
| S-061 | CTTGGGTCGTAGACATCGACGACTACTTTTTGTTTAAGCCTTAAATCAAGAATCGAGAA  |
| S-062 | CTTGGGTCGTAGACATCGACGACTACTAGGTTTTGAACGTCAAAAATGAAAGCGCTAAT  |
| S-063 | CTTGGGTCGTAGACATCGACGACTACTCAAGCAAGACGCGCCTGTTTATCAAGAATCGC  |
| S-064 | CTTGGGTCGTAGACATCGACGACTACTAATGCAGACCGTTTTTATTTTCATCTTGCGGG  |
| S-065 | CTTGGGTCGTAGACATCGACGACTACTCATATTTAGAAATACCGACCGTGTACCTTTT   |
| S-066 | CTTGGGTCGTAGACATCGACGACTACTAATGGTTTACAACGCCAACATGTAGTTCAGCT  |
| S-067 | CTTGGGTCGTAGACATCGACGACTACTTAACCTCCATATGTGAGTGAATAAACAAAATC  |
| S-068 | CTTGGGTCGTAGACATCGACGACTACTAAATCAATGGCTTAGGTTGGGTTACTAAATTT  |
| S-069 | CTTGGGTCGTAGACATCGACGACTACTGCGCAGAGATATCAAAATTATTTGACATTATC  |
| S-070 | CTTGGGTCGTAGACATCGACGACTACTAACCTACCGCGAATTATTCATTTCCAGTACAT  |
| S-071 | CTTGGGTCGTAGACATCGACGACTACTATTTTGCCTTTTAGGAGCACTAAGCAACAGT   |
| S-118 | CTTGGGTCGTAGACATCGACGACTACTGTTAAAATTTTAAACCAATAGGAACCCGGCACC |
| S-120 | CTTGGGTCGTAGACATCGACGACTACTAGGTAAAGAAATCACCATCAATATAATATTTT  |
| S-121 | CTTGGGTCGTAGACATCGACGACTACTTTTCATTTGGTCAATAACCTGTTTATATCGCG  |
| S-122 | CTTGGGTCGTAGACATCGACGACTACTTCGCAAATGGGGCGCGAGCTGAAATAATGTGT  |
| S-123 | CTTGGGTCGTAGACATCGACGACTACTTTTTAATTGCCGAAAGACTTCAAAACACTAT   |
| S-124 | CTTGGGTCGTAGACATCGACGACTACTAAGAGGAACGAGCTTCAAAGCGAAGATACATT  |
| S-139 | CTTGGGTCGTAGACATCGACGACTACTGAAGATCGGTGCGGGCCTCTTCGCAATCATGG  |
| S-140 | CTTGGGTCGTAGACATCGACGACTACTAAATAATTTTAAATTGTAAACGTTGATATTCA  |
| S-141 | CTTGGGTCGTAGACATCGACGACTACTGCAAATATCGCGTCTGGCCTTCTGGCCTCAG   |
| S-142 | CTTGGGTCGTAGACATCGACGACTACTACGTTCTAAATGCAATGCCTGAGAGGTGGCA   |
| S-162 | CTTGGGTCGTAGACATCGACGACTACTCAGCTGGCGGACGACGACAGTATCGTAGCCAG  |
| S-163 | CTTGGGTCGTAGACATCGACGACTACTGTTTGAGGGAAAGGGGGATGTGCTAGAGGATC  |
| S-164 | CTTGGGTCGTAGACATCGACGACTACTCTTTCATCCCCAAAACAGGAAGACCGGAGAG   |
| S-165 | CTTGGGTCGTAGACATCGACGACTACTAGAAAAGCAACATTAATGTGAGCATCTGCCA   |
| S-188 | CTTGGGTCGTAGACATCGACGACTACTACCGTCGTCATATGTACCCCGGTAAAGGCTA   |
| S-189 | CTTGGGTCGTAGACATCGACGACTACTCATGTCAAGATTCTCCGTGGGAACCGTTGGTG  |
| S-190 | CTTGGGTCGTAGACATCGACGACTACTCAGGTCACTTTTGCGGGAGAAGCAGAATTAG   |



|       |                                                               |
|-------|---------------------------------------------------------------|
| S-191 | CTTGGGTCGTAGACATCGACGACTACTCTGTAATATTGCCTGAGAGTCTGGAAAAGTCTAG |
| S-192 | CTTGGGTCGTAGACATCGACGACTACTCAAATTAAGTACGGTGTCTGGAAGAGGTCA     |
| S-193 | CTTGGGTCGTAGACATCGACGACTACTTGCAACTAAGCAATAAAGCCTCAGTTATGACC   |
| S-194 | CTTGGGTCGTAGACATCGACGACTACTTTTTGCGCAGAAAACGAGAATGAATGTTAG     |
| S-195 | CTTGGGTCGTAGACATCGACGACTACTAAACAGTTGATGGCTTAGAGCTTATTTAAATA   |
| S-196 | CTTGGGTCGTAGACATCGACGACTACTACTGGATAACGGAACAACATTATTACCTTATG   |
| S-197 | CTTGGGTCGTAGACATCGACGACTACTACGAACTAGCGTCCAATACTGCGGAATGCTTT   |
| S-198 | CTTGGGTCGTAGACATCGACGACTACTCGATTTTAGAGGACAGATGAACGGCGCGACCT   |
| S-199 | CTTGGGTCGTAGACATCGACGACTACTTTTAAAAGAACTGGCTCATTATTTAATAAA     |

### Sequences of rectangular origami staple strands

| Number | Sequences (5'-3')                 |
|--------|-----------------------------------|
| 001    | CAAGCCAATAGGAACCCATGTACAAACAGTT   |
| 002    | AATGCCCGTAACAGTGCCCGTATCTCCCTCA   |
| 003    | TGCCTTGACTGCCTATTTTCGGAACAGGGATAG |
| 004    | GAGCCGCCCCACCACCGGAACCGCGACGGAAA  |
| 005    | AACCAGAGACCTCAGAACCGCCAGGGGTCAG   |
| 006    | TTATTCATAGGGAAGGTAAATATTCATTCAGT  |
| 007    | CATAACCCGAGGCATAGTAAGAGCTTTTTAAG  |
| 008    | ATTGAGGGTAAAGGTGAATTATCAATCACCGG  |
| 009    | AAAAGTAATATCTTACCGAAGCCCTCCAGAG   |
| 010    | GCAATAGCGCAGATAGCCGAACAATTCAACCG  |
| 011    | CCTAATTTACGCTAACGAGCGTCTAATCAATA  |
| 012    | TCTTACCAGCCAGTTACAAAATAAATGAAATA  |
| 013    | ATCGGCTGCGAGCATGTAGAAACCTATCATAT  |
| 014    | CTAATTTATCTTTCCTTATCATTATCCTGAA   |
| 015    | GCGTTATAGAAAAAGCCTGTTTAGAAGGCCGG  |
| 016    | GCTCATTTCGCATTAAATTTTGGAGCTTAGA   |
| 017    | AATTACTACAAATTCCTTACCAGTAATCCCATC |
| 018    | TTAAGACGTTGAAAACATAGCGATAACAGTAC  |
| 019    | TAGAATCCCTGAGAAGAGTCAATAGGAATCAT  |
| 020    | CTTTTACACAGATGAATATACAGTAAACAATT  |
| 021    | TTTAACGTTCCGGGAGAAACAATAATTTCCCT  |
| 022    | CGACAATAAGTATTAGACTTTACAATACCGA   |
| 023    | GGATTTAGCGTATTAATCCTTTGTTTTCAGG   |
| 024    | ACGAACCAAAACATCGCCATTAATGGTGGTT   |
| 025    | GAACGTGGCGAGAAAGGAAGGGAACAACTAT   |

|     |                                   |
|-----|-----------------------------------|
| 026 | TAGCCCTACCAGCAGAAGATAAAAAACATTTGA |
| 027 | CGGCCTTGCTGGTAATATCCAGAACGAAGTGA  |
| 028 | CTCAGAGCCACCACCCTCATTTTCCTATTATT  |
| 029 | CTGAAACAGGTAATAAGTTTTAACCCCTCAGA  |
| 030 | AGTGTAAGTAAAGTATTAAGAGGCCGCCACC   |
| 031 | GCCACCACTCTTTTCATAATCAAACCGTCACC  |
| 032 | GTTTGCCACCTCAGAGCCGCCACCGATACAGG  |
| 033 | GACTTGAGAGACAAAAGGGCGACAAGTTACCA  |
| 034 | AGCGCCAACCATTTGGGAATTAGATTATTAGC  |
| 035 | GAAGGAAAATAAGAGCAAGAAACAACAGCCAT  |
| 036 | GCCCAATACCGAGGAAACGCAATAGGTTTACC  |
| 037 | ATTATTTAACCCAGCTACAATTTTCAAGAACG  |
| 038 | TATTTTGCTCCAATCCAAATAAGTGAGTTAA   |
| 039 | GGTATTAAGAACAAGAAAAATAATTAAGCCA   |
| 040 | TAAGTCCTACCAAGTACCGCACTCTTAGTTGC  |
| 041 | ACGCTCAAATAAGAATAAACACCGTGAATTT   |
| 042 | AGGCGTTACAGTAGGGCTTAATTGACAATAGA  |
| 043 | ATCAAATCGTCGCTATTAATTAACGGATTTCG  |
| 044 | CTGTAAATCATAGGTCTGAGAGACGATAAATA  |
| 045 | CCTGATTGAAAGAAATTGCGTAGACCCGAACG  |
| 046 | ACAGAAATCTTTGAATACCAAGTTCCTTGCTT  |
| 047 | TTATTAATGCCGTCAATAGATAATCAGAGGTG  |
| 048 | AGATTAGATTTAAAAGTTTGAGTACACGTAAA  |
| 049 | AGGCGGTCATTAGTCTTTAATGCGCAATATTA  |
| 050 | GAATGGCTAGTATTAACACCGCCTCAACTAAT  |
| 051 | CCGCCAGCCATTGCAACAGGAAAAATATTTTT  |
| 052 | CCCTCAGAACCGCCACCCTCAGAAGTACTGACT |
| 053 | CCTCAAGAATACATGGCTTTTGATAGAACCAC  |
| 054 | TAAGCGTCGAAGGATTAGGATTAGTACCGCCA  |
| 055 | CACCAGAGTTCGGTCATAGCCCCGCCAGCAA   |
| 056 | TCGGCATTCCGCCGCCAGCATTGACGTTCCAG  |
| 057 | AATCACCAAATAGAAAATTCATATATAACGGA  |
| 058 | TCACAATCGTAGCACCATTACCATCGTTTTCA  |
| 059 | ATACCCAAGATAACCCACAAGAATAAACGATT  |
| 060 | ATCAGAGAAAGAACTGGCATGATTTTATTTTG  |
| 061 | TTTTGTTAAGCCTTAAATCAAGAATCGAGAA   |
| 062 | AGGTTTTGAACGTCAAAAATGAAAGCGCTAAT  |

|     |                                   |
|-----|-----------------------------------|
| 063 | CAAGCAAGACGCGCCTGTTTATCAAGAATCGC  |
| 064 | AATGCAGACCGTTTTTATTTTCATCTTGCGGG  |
| 065 | CATATTTAGAAATACCGACCGTGTACCTTTT   |
| 066 | AATGGTTTACAACGCCAACATGTAGTTCAGCT  |
| 067 | TAACTCCATATGTGAGTGAATAAACAAAATC   |
| 068 | AAATCAATGGCTTAGGTTGGGTTACTAAATTT  |
| 069 | GCGCAGAGATATCAAAATTATTTGACATTATC  |
| 070 | AACCTACCGCAATTATTCATTTCCAGTACAT   |
| 071 | ATTTTGCCTCTTAGGAGCACTAAGCAACAGT   |
| 072 | CTAAATAGAACAAGAAACCACCAGGGTTAG    |
| 073 | GCCACGCTATACGTGGCACAGACAACGCTCAT  |
| 074 | GCGTAAGAGAGAGCCAGCAGCAAAAAGGTTAT  |
| 075 | GGAAATACCTACATTTTGACGCTCACCTGAAA  |
| 076 | TATCACCGTACTCAGGAGGTTTAGCGGGGTTT  |
| 077 | TGCTCAGTCAGTCTCTGAATTTACCAGGAGGT  |
| 078 | GGAAAGCGACCAGGCGGATAAGTGAATAGGTG  |
| 079 | TGAGGCAGGCGTCAGACTGTAGCGTAGCAAGG  |
| 080 | TGCCTTTAGTCAGACGATTGGCCTGCCAGAAT  |
| 081 | CCGAAAACACACCACGGAATAAGTAAGACTCC  |
| 082 | ACGCAAAGGTCACCAATGAAACCAATCAAGTT  |
| 083 | TTATTACGGTCAGAGGGTAATTGAATAGCAGC  |
| 084 | TGAACAAACAGTATGTTAGCAAATAAAAGAA   |
| 085 | CTTTACAGTTAGCGAACCTCCCGACGTAGGAA  |
| 086 | GAGGCGTTAGAGAATAACATAAAAGAACACCC  |
| 087 | TCATTACCCGACAATAAACAACATATTTAGGC  |
| 088 | CCAGACGAGCGCCCAATAGCAAGCAAGAACGC  |
| 089 | AGAGGCATAATTTTCATCTTCTGACTATAACTA |
| 090 | TTTTAGTTTTTCGAGCCAGTAATAAATTCTGT  |
| 091 | TATGTAAACCTTTTTTAATGGAAAAATTACCT  |
| 092 | TTGAATTATGCTGATGCAAATCCACAAATATA  |
| 093 | GAGCAAAAATTCTGAATAATGGAAGAAGGAG   |
| 094 | TGGATTATGAAGATGATGAAACAAAATTTTCAT |
| 095 | CGGAATTATTGAAAGGAATTGAGGTGAAAAAT  |
| 096 | ATCAACAGTCATCATATTCCTGATTGATTGTT  |
| 097 | CTAAAGCAAGATAGAACCCTTCTGAATCGTCT  |
| 098 | GCCAACAGTCACCTTGCTGAACCTGTTGGCAA  |
| 099 | GAAATGGATTATTTACATTGGCAGACATTCTG  |

|     |                                                 |
|-----|-------------------------------------------------|
| 100 | TTTTATAAGTATAGCCCGCCGTCGAG                      |
| 101 | AGGGTTGATTTTATAAATCCTCATTAAATGATATTC            |
| 102 | ACAAACAATTTTAATCAGTAGCGACAGATCGATAGC            |
| 103 | AGCACCGTTTTTTAAAGGTGGCAACATAGTAGAAAA            |
| 104 | TACATACATTTTGACGGGAGAATTAACACAGGGAA             |
| 105 | GCGCATTATTTTGCTTATCCGGTATTCTAAATCAGA            |
| 106 | TATAGAAGTTTTCGACAAAAGGTAAAGTAGAGAATA            |
| 107 | TAAAGTACTTTTCGCGAGAAAACCTTTTATCGCAAG            |
| 108 | ACAAAGAATTTTATTAATTACATTTAACACATCAAG            |
| 109 | AAAACAAATTTTTTCATCAATATAATCCTATCAGAT            |
| 110 | GATGGCAATTTAATCAATATCTGGTCACAAATATC             |
| 111 | AAACCTCTTTTACCAGTAATAAAAGGGATTCACCAGTCACACGTTTT |
| 112 | CCGAAATCCGAAATCCTGTTTGAAGCCGGAA                 |
| 113 | CCAGCAGGGGCAAAATCCCTTATAAAGCCGGC                |
| 114 | GCATAAAGTTCACACAACATACGAAGCGCCA                 |
| 115 | GCTCACAATGTAAAGCCTGGGGTGGGTTTGCC                |
| 116 | TTCGCCATTGCCGAAAACCAGGCATTAATCA                 |
| 117 | GCTTCTGGTCAGGCTGCGCAACTGTGTTATCC                |
| 118 | GTTAAAATTTTAACCAATAGGAACCCGGCACC                |
| 119 | AGACAGTCATTCAAAGGGTGAGAAGCTATAT                 |
| 120 | AGGTAAGAAATCACCATCAATATAATATTTT                 |
| 121 | TTTCATTTGGTCAATAACCTGTTTATATCGCG                |
| 122 | TCGCAAATGGGGCGCGAGCTGAAATAATGTGT                |
| 123 | TTTTAATTGCCCGAAAGACTTCAAACACTAT                 |
| 124 | AAGAGGAACGAGCTTCAAAGCGAAGATACATT                |
| 125 | GGAATTACTCGTTTACCAGACGACAAAAGATT                |
| 126 | GAATAAGGACGTAAACAAAGCTGCTCTAAAACA               |
| 127 | CCAAATCACTTGCCCTGACGAGAACGCCAAAA                |
| 128 | CTCATCTTGAGGCAAAGAATACAGTGAATTT                 |
| 129 | AAACGAAATGACCCCCAGCGATTATTCATTAC                |
| 130 | CTTAAACATCAGCTTGCTTTGAGCGTAACAC                 |
| 131 | TCGGTTTAGCTTGATACCGATAGTCCAACCTA                |
| 132 | TGAGTTTCGTCACCAGTACAACTTAATTGTA                 |
| 133 | CCCCGATTTAGAGCTTGACGGGAAATCAAAA                 |
| 134 | GAATAGCCGCAAGCGGTCCACGCTCCTAATGA                |
| 135 | GAGTTGCACGAGATAGGGTTGAGTAAGGGAGC                |
| 136 | GTGAGCTAGTTTCTGTGTGAAATTTGGGAAG                 |

|     |                                   |
|-----|-----------------------------------|
| 137 | TCATAGCTACTCACATTAATTGCGCCTGAGA   |
| 138 | GGCGATCGCACTCCAGCCAGCTTTGCCATCAA  |
| 139 | GAAGATCGGTGCGGGCCTCTTCGCAATCATGG  |
| 140 | AAATAATTTTAAATTGTAAACGTTGATATTCA  |
| 141 | GCAAATATCGCGTCTGGCCTTCTGGCCTCAG   |
| 142 | ACCGTTCTAAATGCAATGCCTGAGAGGTGGCA  |
| 143 | TATATTTTAGCTGATAAATTAATGTTGTATAA  |
| 144 | TCAATTCCTTTAGTTTGACCATTACCAGACCG  |
| 145 | CGAGTAGAACTAATAGTAGTAGCAAACCTCA   |
| 146 | GAAGCAAAAAAGCGGATTGCATCAGATAAAAA  |
| 147 | TCAGAAGCCTCCAACAGGTCAGGATCTGCGAA  |
| 148 | CCAAAATATAATGCAGATACATAAACACCAGA  |
| 149 | CATTCAACGCGAGAGGCTTTTGCATATTATAG  |
| 150 | ACGAGTAGTGACAAGAACCGGATATACCAAGC  |
| 151 | AGTAATCTTAAATTGGGCTTGAGAGAATACCA  |
| 152 | GCGAAACATGCCACTACGAAGGCATGCGCCGA  |
| 153 | ATACGTAAAAGTACAACGGAGATTTTCATCAAG |
| 154 | CAATGACACTCCAAAAGGAGCCTTACAACGCC  |
| 155 | AAAAAAGGACAACCATCGCCACGCGGGTAAA   |
| 156 | TGTAGCATTCCACAGACAGCCCTCATCTCAA   |
| 157 | GTAAAGCACTAAATCGGAACCCTAGTTGTTCC  |
| 158 | AGTTTGGAGCCCTTACCGCCTGGTTGCGCTC   |
| 159 | AGCTGATTACAAGAGTCCACTATTGAGGTGCC  |
| 160 | ACTGCCC GCCGAGCTCGAATTCGTTATTACGC |
| 161 | CCCGGTACTTTCCAGTCGGGAAACGGGCAAC   |
| 162 | CAGCTGGCGGACGACGACAGTATCGTAGCCAG  |
| 163 | GTTTGAGGGAAAGGGGGATGTGCTAGAGGATC  |
| 164 | CTTTCATCCCCAAAAACAGGAAGACCGGAGAG  |
| 165 | AGAAAAGCAACATTAATGTGAGCATCTGCCA   |
| 166 | GGTAGCTAGGATAAAAATTTTGTAAACATC    |
| 167 | CAACGCAATTTTGGAGAGATCTACTGATAATC  |
| 168 | CAATAAATACAGTTGATTCCCAATTTAGAGAG  |
| 169 | TCCATATACATACAGGCAAGGCAACTTTATTT  |
| 170 | TACCTTTAAGGTCTTTACCCTGACAAAGAAGT  |
| 171 | CAAAAATCATTGCTCCTTTTGATAAGTTTCAT  |
| 172 | TTTGCCAGATCAGTTGAGATTTAGTGGTTTAA  |
| 173 | AAAGATTCAGGGGGTAATAGTAAACCATAAAT  |

|     |                                     |
|-----|-------------------------------------|
| 174 | TTTCAACTATAGGCTGGCTGACCTTGTATCAT    |
| 175 | CCAGGCGCTTAATCATTGTGAATTACAGGTAG    |
| 176 | CGCCTGATGGAAGTTTCCATTAAACATAACCG    |
| 177 | TTTCATGAAAATTGTGTCGAAATCTGTACAGA    |
| 178 | ATATATTCTTTTTTCACGTTGAAAATAGTTAG    |
| 179 | AATAATAAGGTCGCTGAGGCTTGCAAAGACTT    |
| 180 | CGTAACGATCTAAAGTTTTGTCGTGAATTGCG    |
| 181 | ACCCAAATCAAGTTTTTTGGGGTCAAAGAACG    |
| 182 | TGGACTCCCTTTTCACCAGTGAGACCTGTCGT    |
| 183 | TGGTTTTTAACGTCAAAGGGCGAAGAACCATC    |
| 184 | GCCAGCTGCCTGCAGGTCGACTCTGCAAGGCG    |
| 185 | CTTGATGCATTAATGAATCGGCCCGCCAGGG     |
| 186 | ATTAAGTTCGCATCGTAACCGTGCAGTAACA     |
| 187 | TAGATGGGGGGTAACGCCAGGGTTGTCCAAG     |
| 188 | ACCCGTCGTCATATGTACCCCGGTAAAGGCTA    |
| 189 | CATGTCAAGATTCTCCGTGGGAACCGTTGGTG    |
| 190 | TCAGGTCACTTTTGCGGGAGAAGCAGAATTAG    |
| 191 | CTGTAATATTGCCTGAGAGTCTGGAAACTAG     |
| 192 | CAAAATTAAGTACGGTGTCTGGAAGAGGTCA     |
| 193 | TGCAACTAAGCAATAAAGCCTCAGTTATGACC    |
| 194 | TTTTTGCAGAAAACGAGAATGAATGTTTAG      |
| 195 | AAACAGTTGATGGCTTAGAGCTTATTTAAATA    |
| 196 | ACTGGATAACGGAACAACATTATTACCTTATG    |
| 197 | ACGAACTAGCGTCCAATACTGCGGAATGCTTT    |
| 198 | CGATTTTAGAGGACAGATGAACGGCGCGACCT    |
| 199 | CTTTGAAAAGAACTGGCTCATTATTTAATAAA    |
| 200 | GCTCCATGAGAGGCTTTGAGGACTAGGGAGTT    |
| 201 | ACGGCTACTTACTTAGCCGGAACGCTGACCAA    |
| 202 | AAAGGCCGAAAGGAACAACATAAGCTTTCCAG    |
| 203 | GAGAATAGCTTTTGCGGGATCGTCGGGTAGCA    |
| 204 | ACGTTAGTAAATGAATTTTCTGTAAGCGGAGT    |
| 205 | TTTTCGATGGCCACTACGTAAACCGTC         |
| 206 | TATCAGGGTTTTCGGTTTGCCTATTGGGAACGCGC |
| 207 | GGGAGAGGTTTTTGTAACGACGGCCATTCCCAGT  |
| 208 | CACGACGTTTTTGTAATGGGATAGGTCAAACGGCG |
| 209 | GATTGACCTTTTGTGAACGGTAATCGTAGCAAACA |
| 210 | AGAGAATCTTTGGTTGTACCAAAAACAAGCATAAA |

|        |                                                  |
|--------|--------------------------------------------------|
| 211    | GCTAAATCTTTTCTGTAGCTCAACATGTATTGCTGA             |
| 212    | ATATAATGTTTTTCATTGAATCCCCCTCAAATCGTCA            |
| 213    | TAAATATTTTTTTGGAAGAAAAATCTACGACCAGTCA            |
| 214    | GGACGTTGTTTTTCATAAGGGAACCGAAAGGCGCAG             |
| 215    | ACGGTCAATTTTGACAGCATCGGAACGAACCCTCAG             |
| 216    | CAGCGAAAATTTTACTTTCAACAGTTTCTGGGATTTTGCTAAACTTTT |
| Loop1  | AACATCACTTGCCTGAGTAGAAGAACT                      |
| Loop2  | TGTAGCAATACTTCTTTGATTAGTAAT                      |
| Loop3  | AGTCTGTCCATCACGCAAATTAACCGT                      |
| Loop4  | ATAATCAGTGAGGCCACCGAGTAAAAG                      |
| Loop5  | ACGCCAGAATCCTGAGAAGTGTTTTT                       |
| Loop6  | TTAAAGGGATTTTAGACAGGAACGGT                       |
| Loop7  | AGAGCGGGAGCTAAACAGGAGGCCGA                       |
| Loop8  | TATAACGTGCTTTCCTCGTTAGAATC                       |
| Loop9  | GTAATATGGTTGCTTTGACGAGCACG                       |
| Loop10 | GCGCTTAATGCGCCGCTACAGGGCGC                       |

## References

- 1 S. Jia, J. Wang, M. Xie, J. Sun, H. Liu, Y. Zhang, J. Chao, J. Li, L. Wang, J. Lin, K. V. Gothelf and C. Fan, *Nat. Commun.*, 2019, **10**, 5597.
